# Supplementary material for: Electronic structures of CuTPP and CuTPP(F) complexes. A combined experimental and theoretical study I
Source: Royal Society of Chemistry journal article supplement (doi:10.1039/c6cp01423b), 2016-01-01
Supplement: c6cp01423b1.pdf [file c6cp01423b1.pdf]

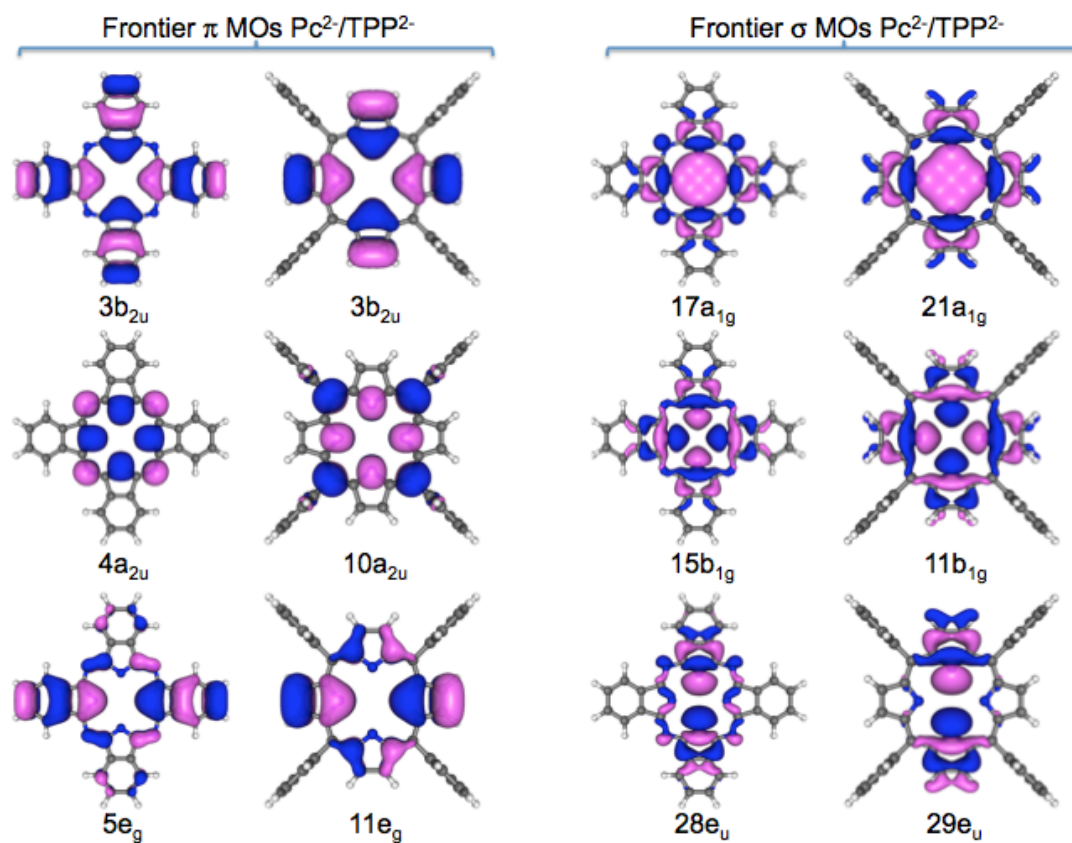

Figure S1. 3D contour plots of the  $N^{Py}$ -based  $Pc^{2-}$  and  $TPP^{2-}$  frontier  $\pi$  and  $\sigma$  MOs. Displayed isosurfaces correspond to  $\pm 0.02 e^{1/2} \text{ \AA}^{-3/2}$  values
