# Supplementary material for: Electronic structures of CuTPP and CuTPP(F) complexes. A combined experimental and theoretical study I
Source: Royal Society of Chemistry journal article supplement (doi:10.1039/c6cp01423b), 2016-01-01
Supplement: c6cp01423b2.pdf [file c6cp01423b2.pdf]

## $2a_{1u}$ MO

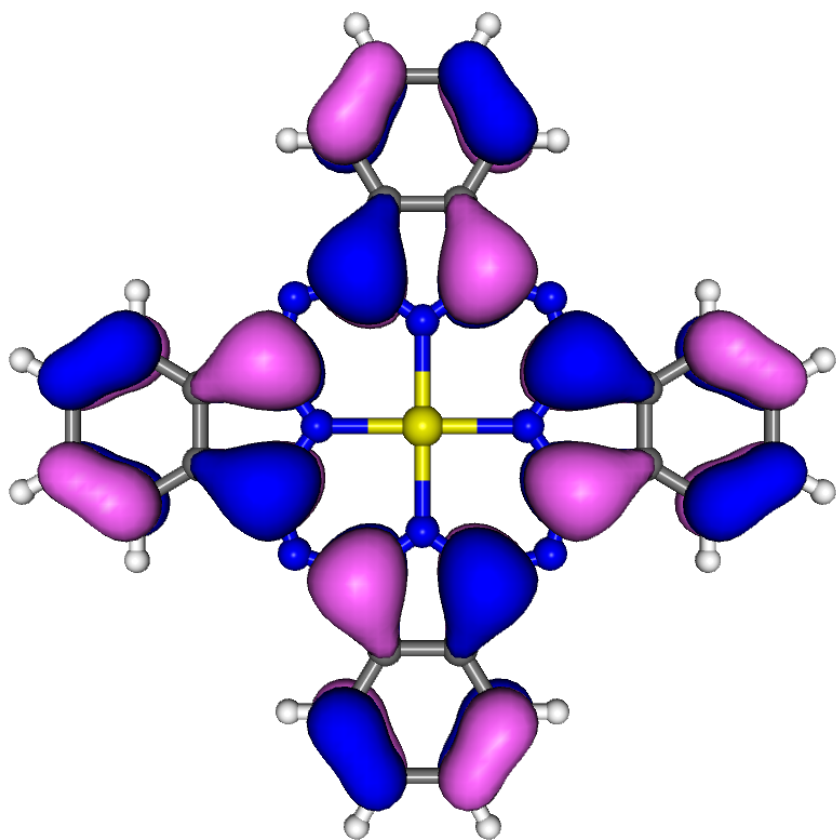

CuPc

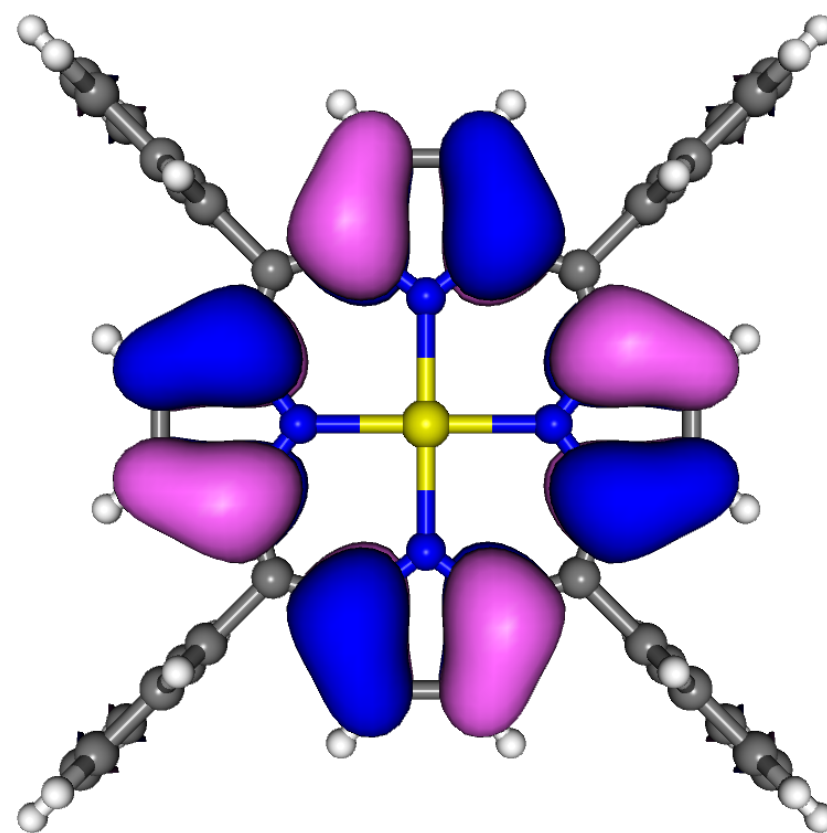

CuTPP

Figure S2. 3D contour plot of the CuPc and CuTPP  $2a_{1u}$  MO. Displayed isosurfaces correspond to  $\pm 0.02 e^{1/2} \text{Å}^{-3/2}$  values
