# Supplementary material for: Electronic structures of CuTPP and CuTPP(F) complexes. A combined experimental and theoretical study I
Source: Royal Society of Chemistry journal article supplement (doi:10.1039/c6cp01423b), 2016-01-01
Supplement: c6cp01423b3.pdf [file c6cp01423b3.pdf]

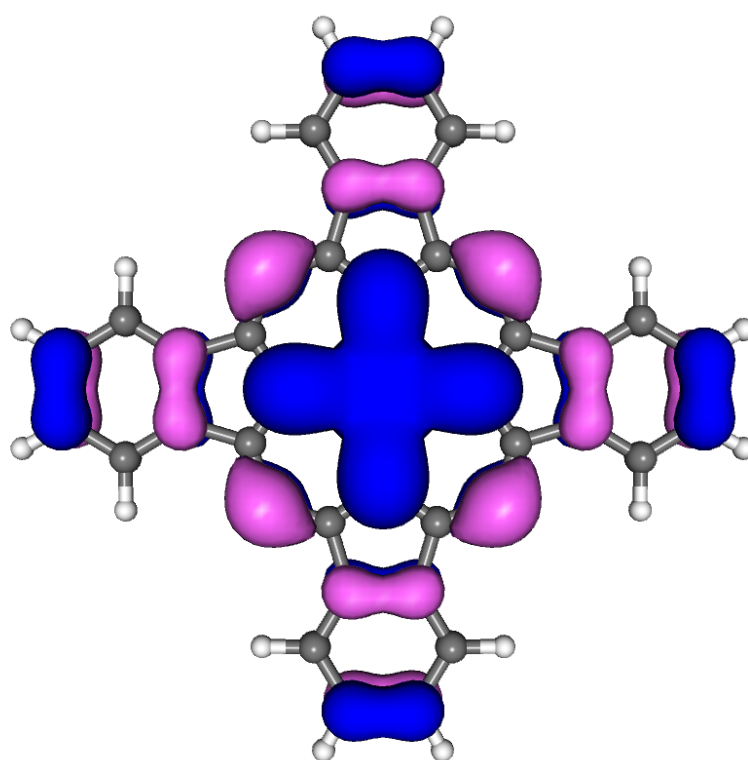

Figure S3. 3D contour plot of the CuPc  $4a_{2u}$  MO. Displayed isosurfaces correspond to  $\pm 0.02 \text{ e}^{1/2} \text{ \AA}^{-3/2}$  values
